# Supplementary material
Source: PubMed Central journal article supplement (PMC3009851)

### Supplementary Data: Figure Legends

Figure 1: 2-CIHA was incubated with liver microsomes for 25 min at 37 °C in the presence of  $\beta$ -NADPH. The reaction products were extracted and analyzed. Product-ion spectra of  $[M-H]^-$  ion of  $\omega$ -hydroxy 2- $^{37}\text{Cl}$ IHA ( $m/z$  307) obtained by ESI-MS/MS is shown.

Figure 2: HepG2 cells were incubated either in the absence or presence of 50  $\mu\text{M}$  2-CIHA. At the end of 24h release of LDH was measured in the media. ( $n = 3$ ,  $p > 0.5$ )

Figure 3: HepG2 cells were incubated either with 0, 1, 10, 25 or 50  $\mu\text{M}$  2-CIHA. The cells (A) and media (B) were separated, extracted at 2, 4, 8 and 24h after addition of the internal standard, 2-Cl- $[d_4-7,8]$ -HA, and analyzed by LC-MS/MS. The data are normalized to cell protein ( $n = 3$  for each time point and the data are shown with + S.E.M.).

Figure 4: HepG2 cells were incubated with 50  $\mu\text{M}$  palmitic acid (Panels A & B) and 1:1 palmitic acid and 2-CIHA (total concentration 50  $\mu\text{M}$ , Panels C & D) for 24h and media was extracted for GC-MS analyses of 2-CIAA following derivatization to its PFB ester. The SIM for 359/361 for 2-CIAA ( $^{35}\text{Cl}$  and  $^{37}\text{Cl}$  isotopes) were monitored. As seen 2-CIAA was not produced in cells incubated with palmitic acid, but was produced in cells incubated in the presence of 2-CIHA.

Supplementary Figure 1

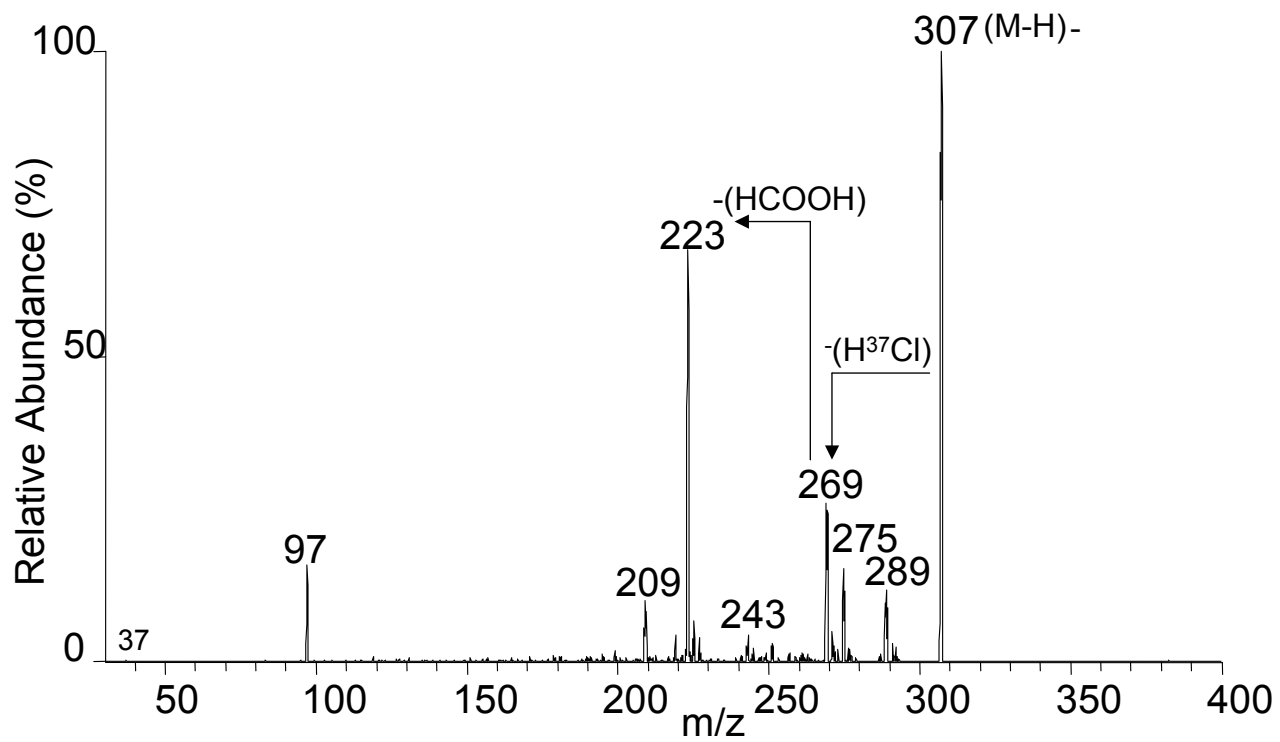

Supplementary Figure 2

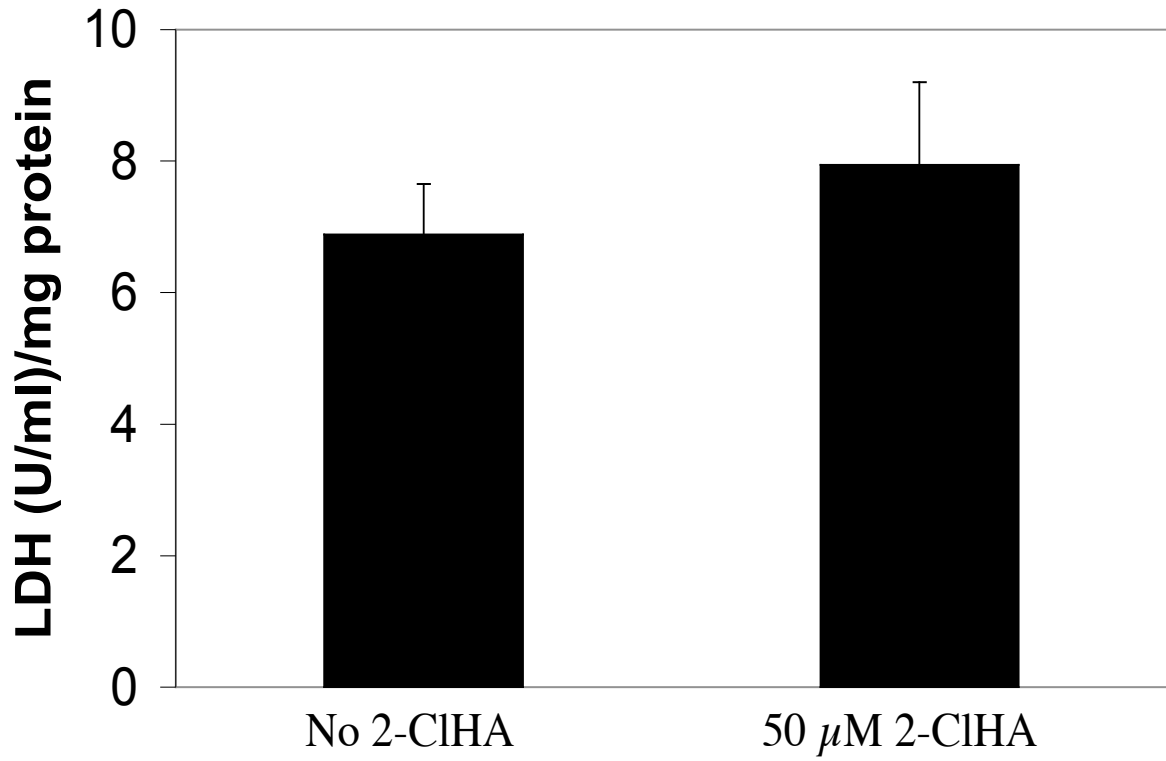

# Supplementary Figure 3

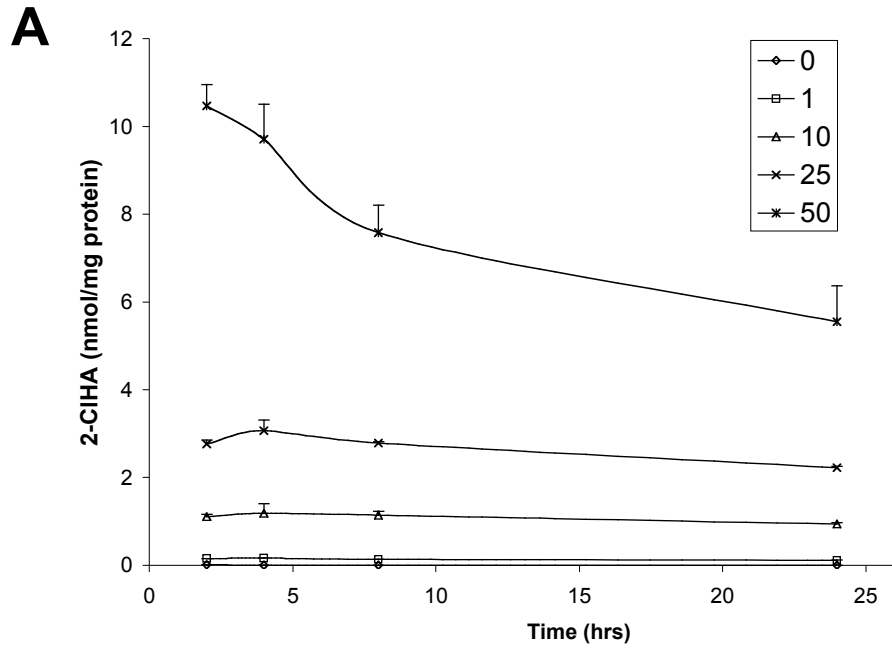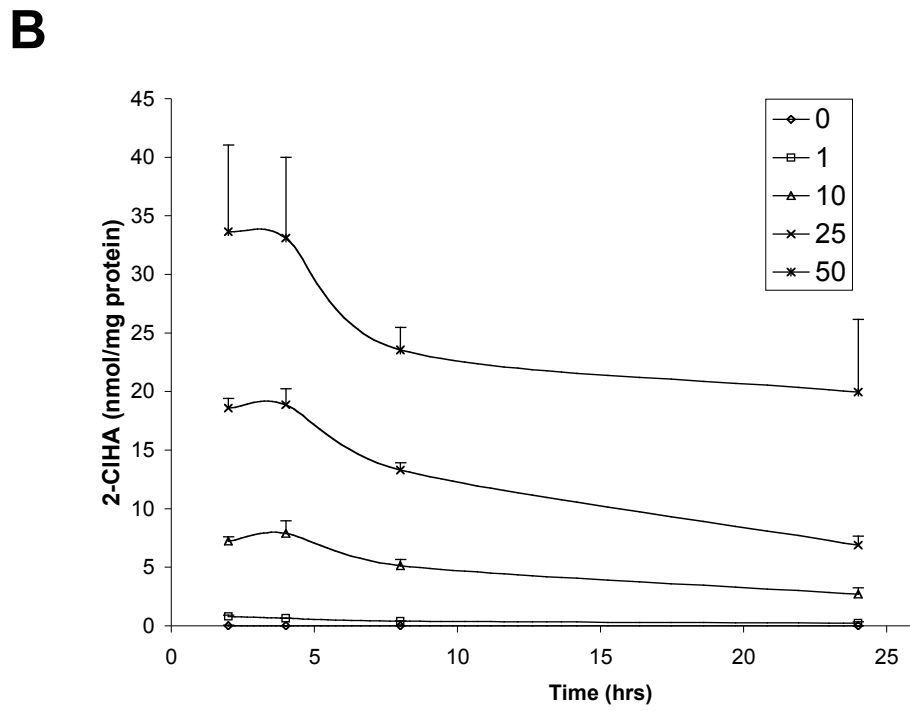

# Supplementary Figure 4

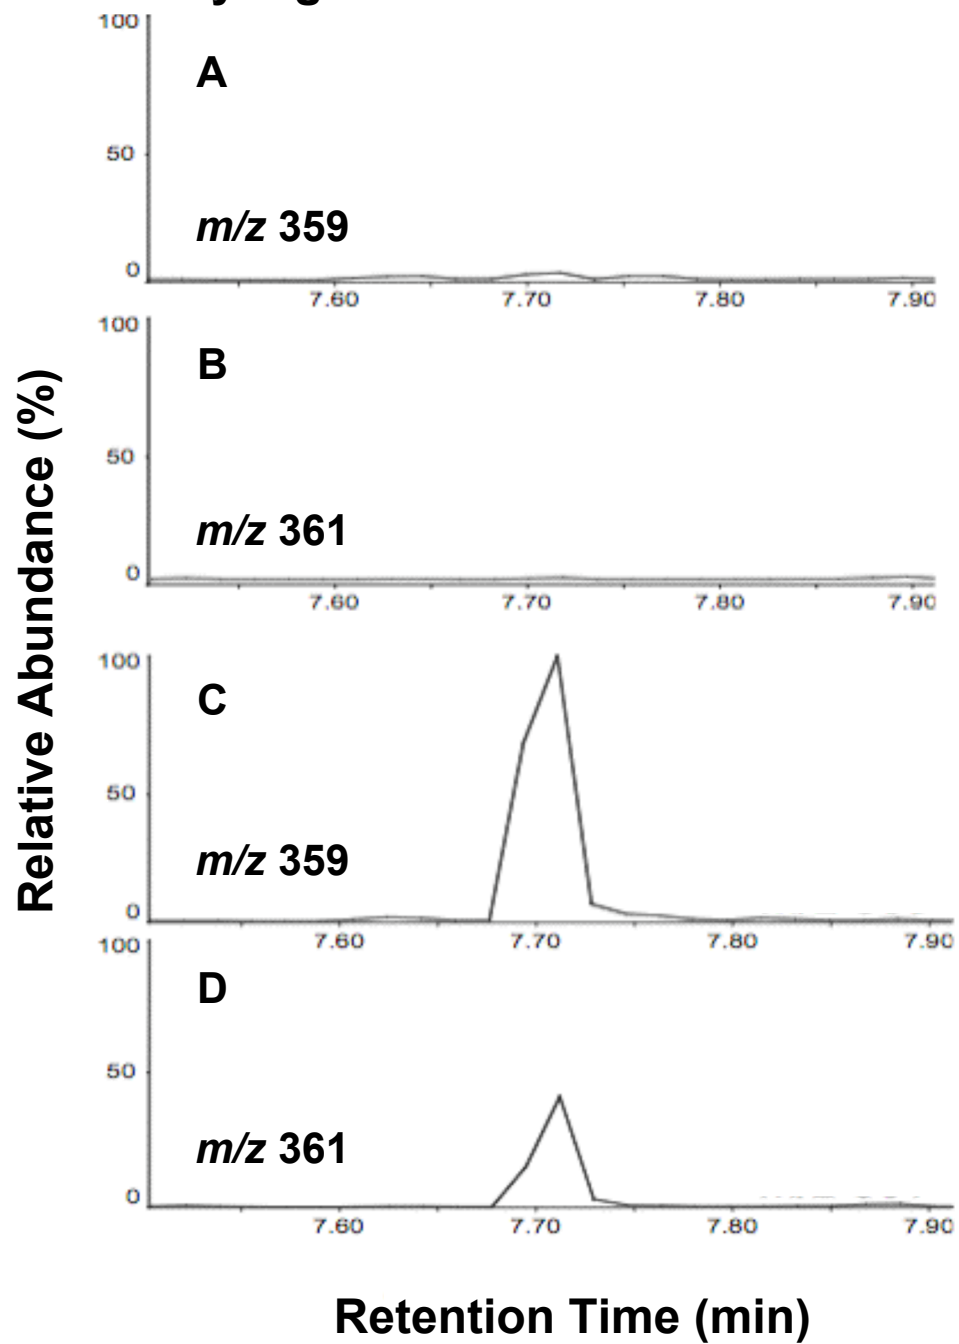

Supplement: supp_M110.147157_SupplementalForJBC.pdf [file supp_M110.147157_SupplementalForJBC.pdf]
